# Supplementary material for: Culture independent assessment of human milk microbial community in lactational mastitis
Source: PubMed Central journal article supplement (PMC5552812; doi:10.1038/s41598-017-08451-7), 2017-08-10
Supplement: 41598_2017_8451_MOESM1_ESM.pdf [file 41598_2017_8451_MOESM1_ESM.pdf]

## Culture independent assessment of human milk microbial community in lactational mastitis

Shriram H. Patel<sup>1,3</sup>, Yati H. Vaidya<sup>1</sup>, Reena J. Patel<sup>1</sup>, Ramesh J. Pandit<sup>2</sup>, Chaitanya G. Joshi<sup>2</sup>, Anju P. Kunjadia<sup>3\*</sup>

1 Ashok and Rita Patel Institute of Integrated Study and Research in Biotechnology and Allied Sciences, ADIT campus, New Vallabh Vidyanagar, Anand, Gujarat, India.

2 Department of Animal Biotechnology, College of Veterinary Science and A. H., Anand Agricultural University, Anand, Gujarat, India.

3 Center for Interdisciplinary Studies in Science and Technology (CISST), Sardar Patel University, Vallabh Vidya Nagar, Gujarat, India.

\* Corresponding author: Anju Kunjadia, Department of Biomedical Science, CISST, Sardar Patel University, Gujarat-388121, India  
Email: anjukunjadia@gmail.com  
Phone. No. 9426583535

### Supplementary Figure legends:

**Supplementary Fig. 1:** PCoA of Phylum to species level taxa revealed more pronounced clustering of healthy, SAM and AM samples at Genus and species level.

**Supplementary Fig. 2:** Dendrogram based on ward linkage clustering of OTU level taxa show different clustering of healthy, SAM and AM samples.

**Supplementary Fig. 3:** Heatmap representation of most abundant family level taxa in healthy, SAM and AM samples.

**Supplementary Fig. 4:** Aerotolerant odds ratio at 95% CI revealed depletion of obligate anaerobes during mastitis.

**Supplementary Fig. 5:** Relative proportion of different metabolic pathways at level 2 between healthy, SAM and AM samples.

**Supplementary Fig. 6:** Predicted KEGG functions such as (a) immune system (b) metabolic disease and (c) infectious disease in individual healthy, SAM and AM samples.

### Supplementary Table legends:

**Supplementary Table 1:** Characteristic of the participants involved in the study.

**Supplementary Table 2:** Summary of sequencing and alpha diversity indices.

Supplementary Fig. 1

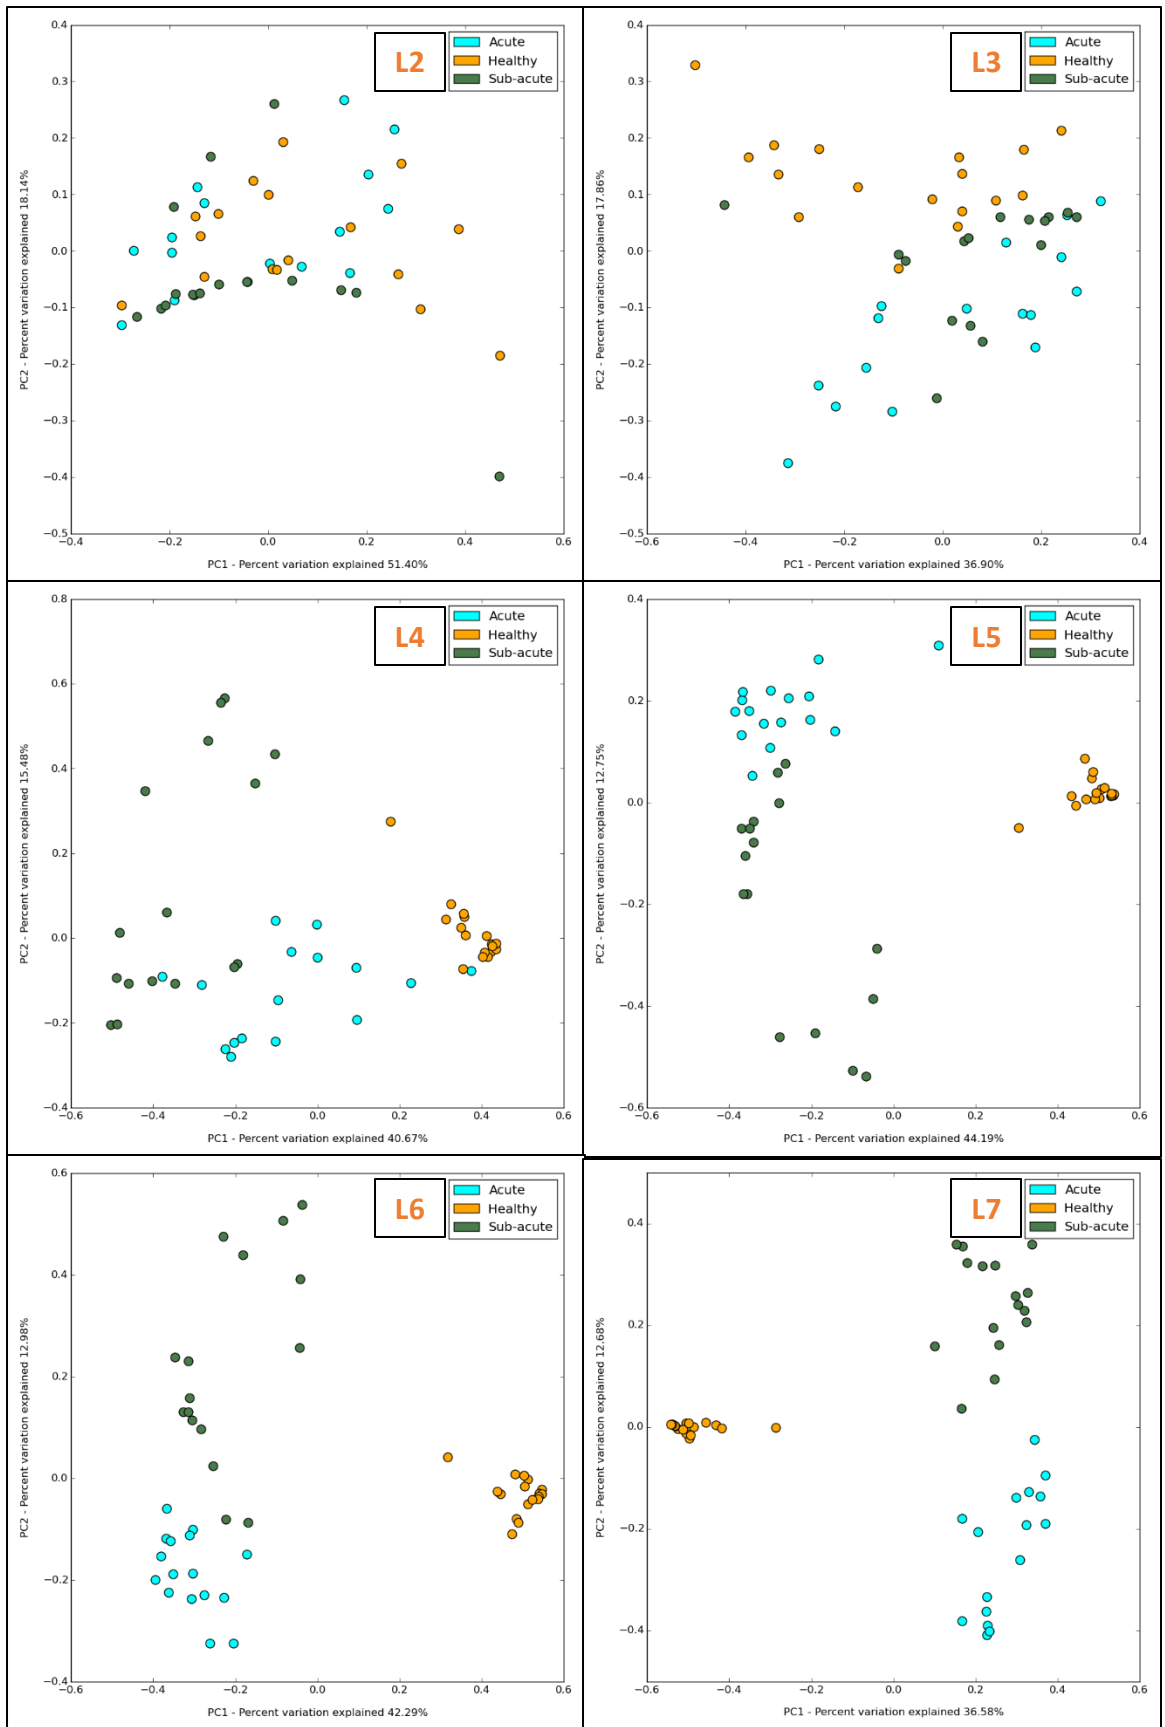

Supplementary Fig. 2

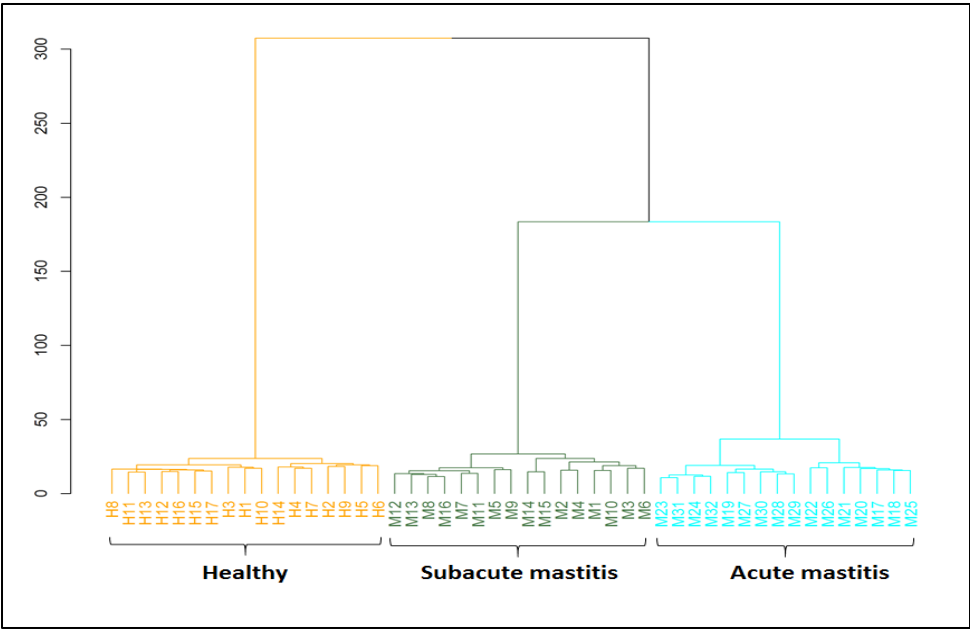

Supplementary Fig. 3

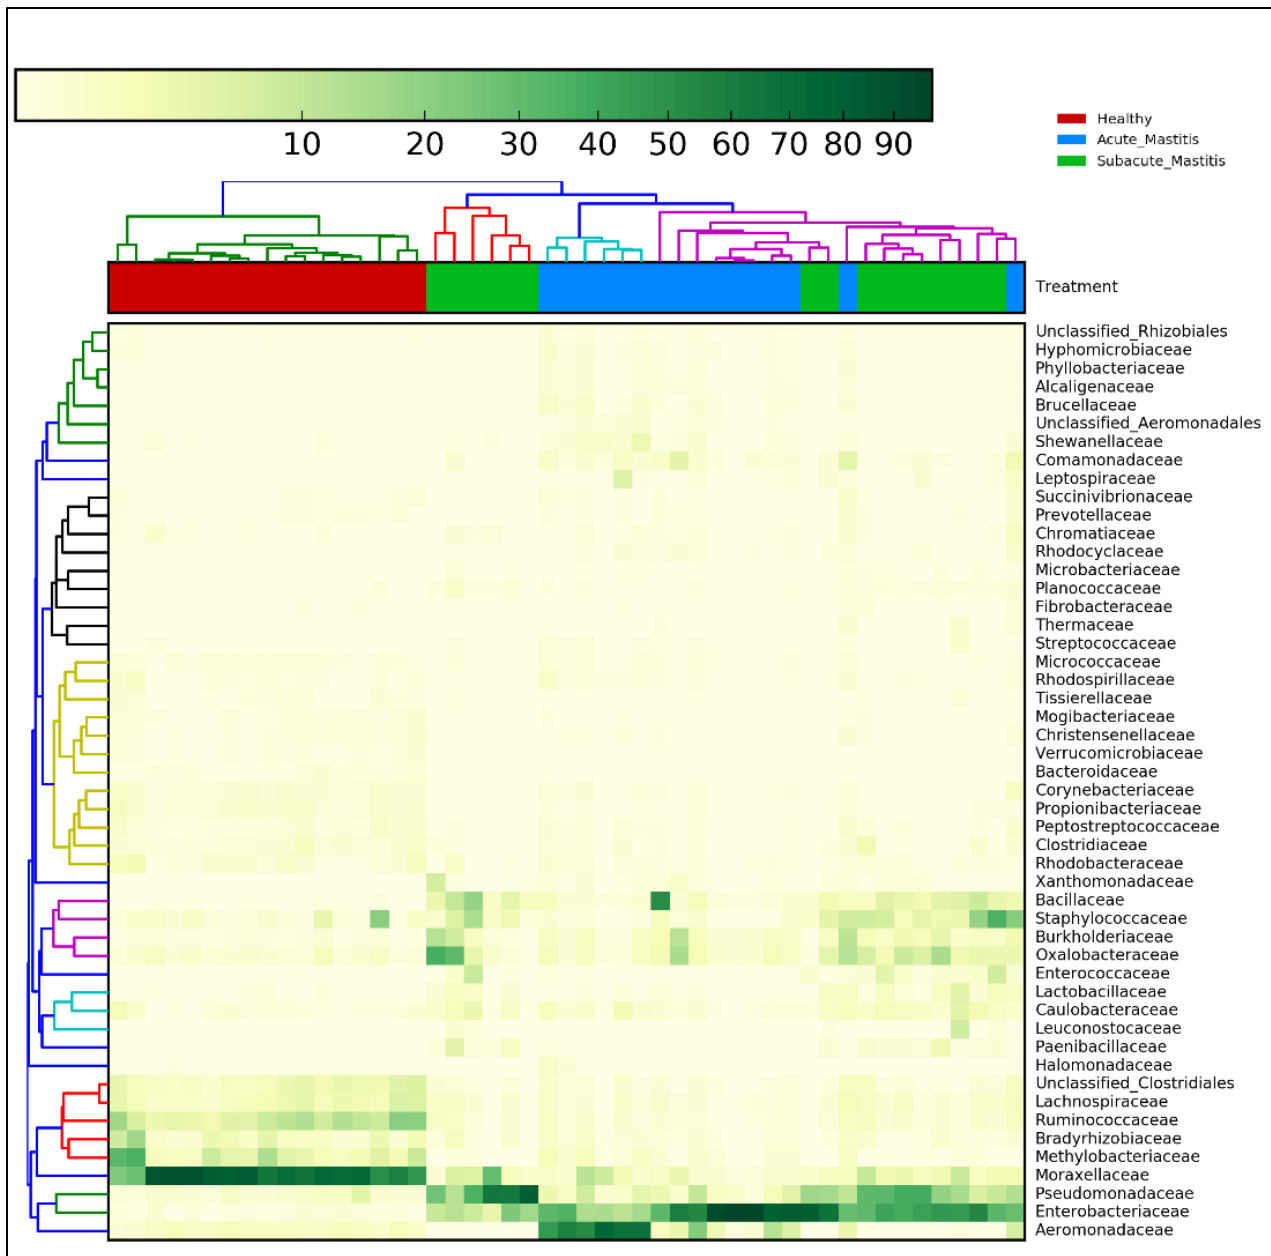

Supplementary Fig. 4

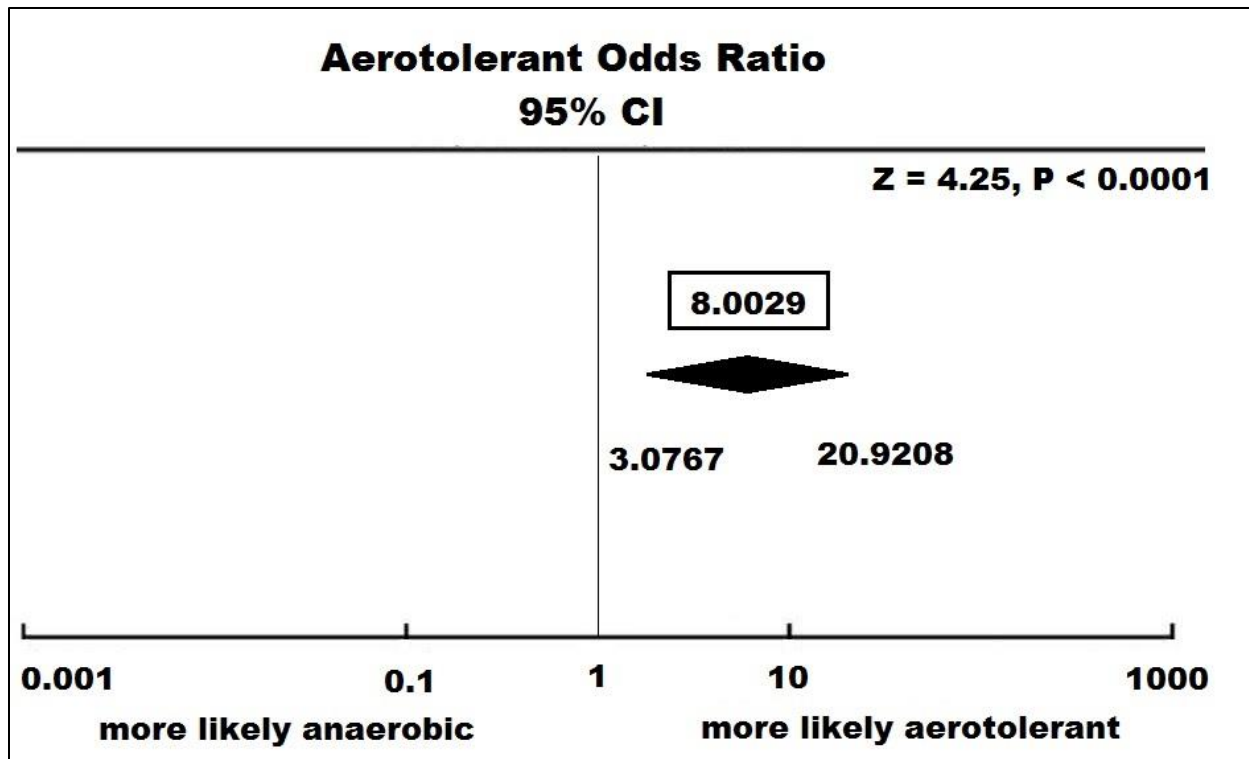

Supplementary Fig. 5:

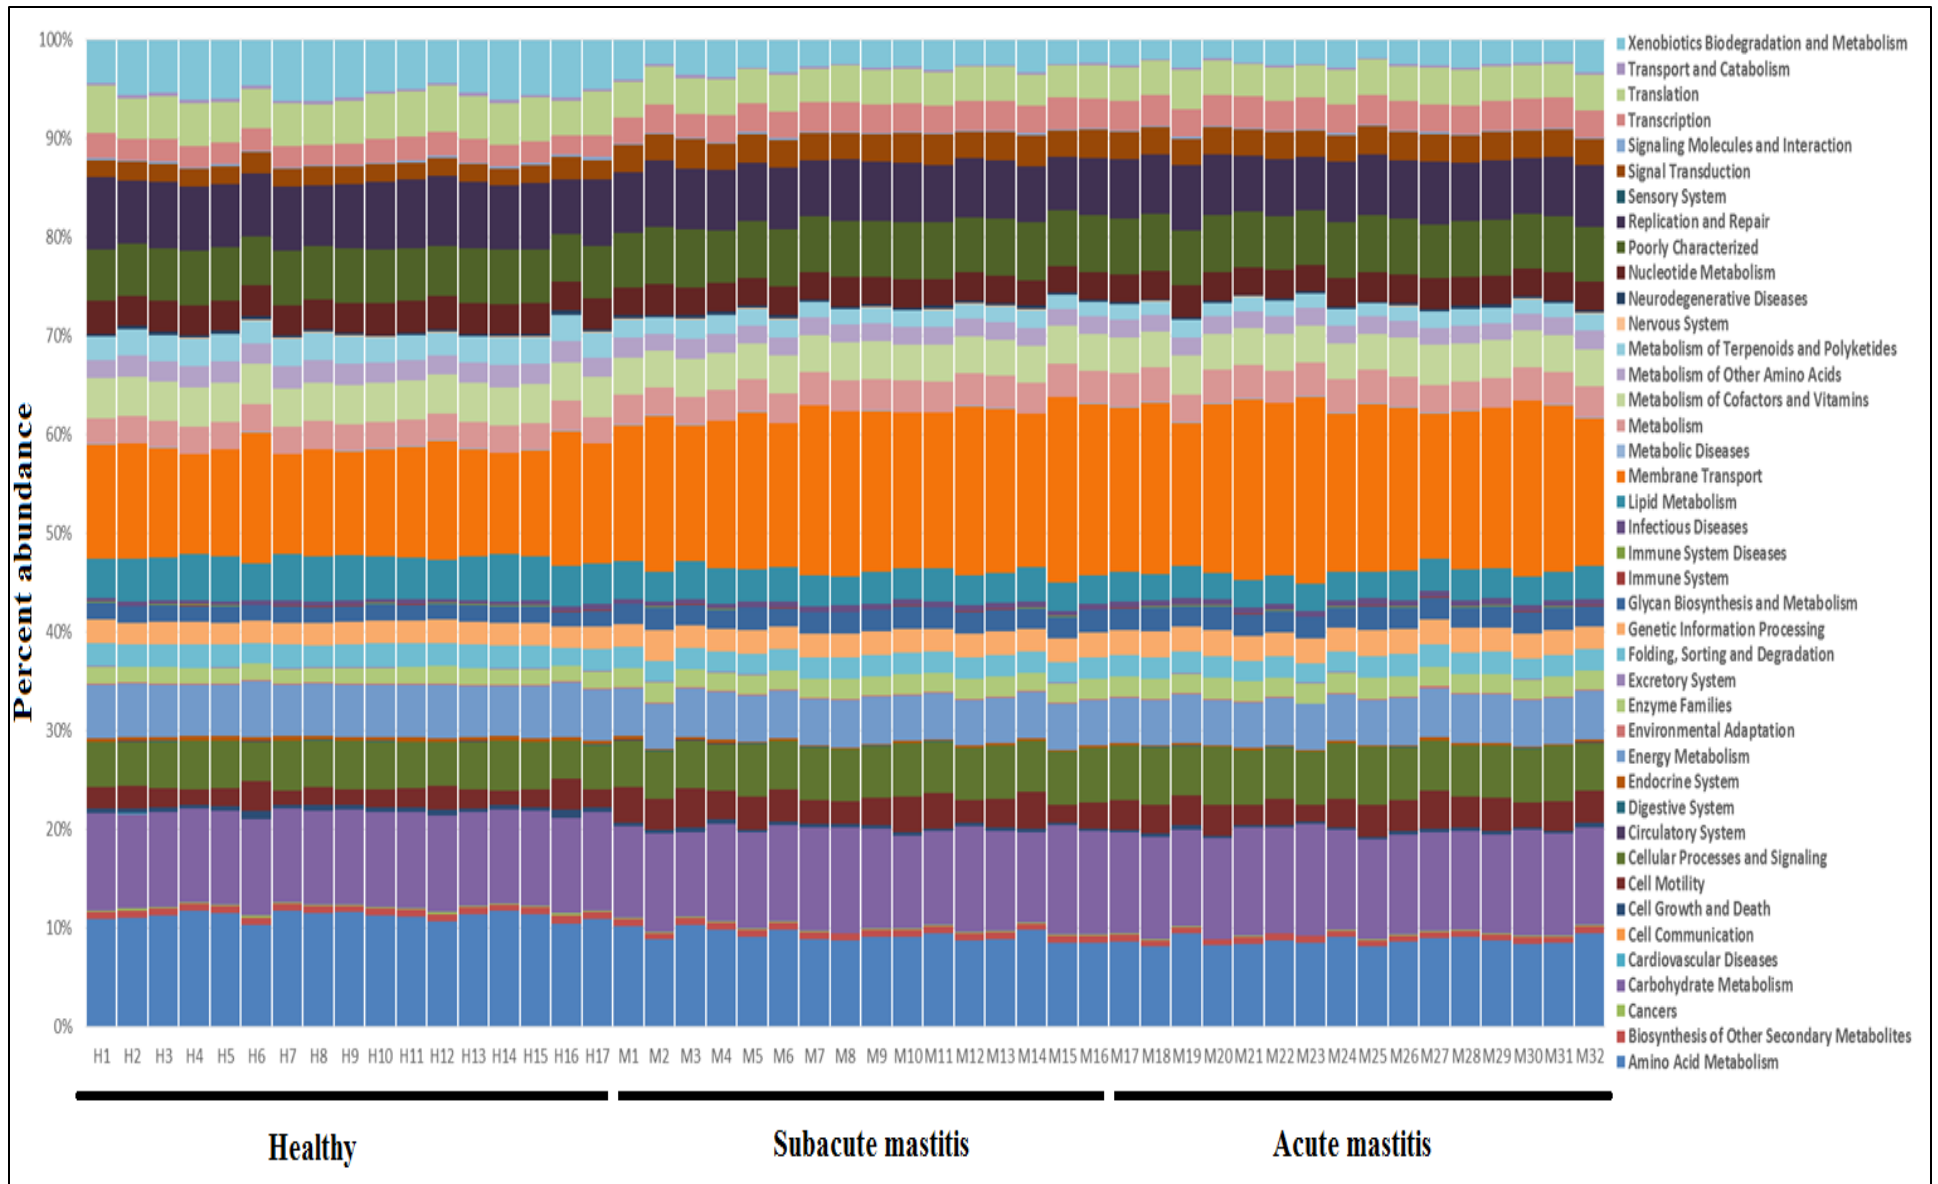

Supplementary Fig. 6

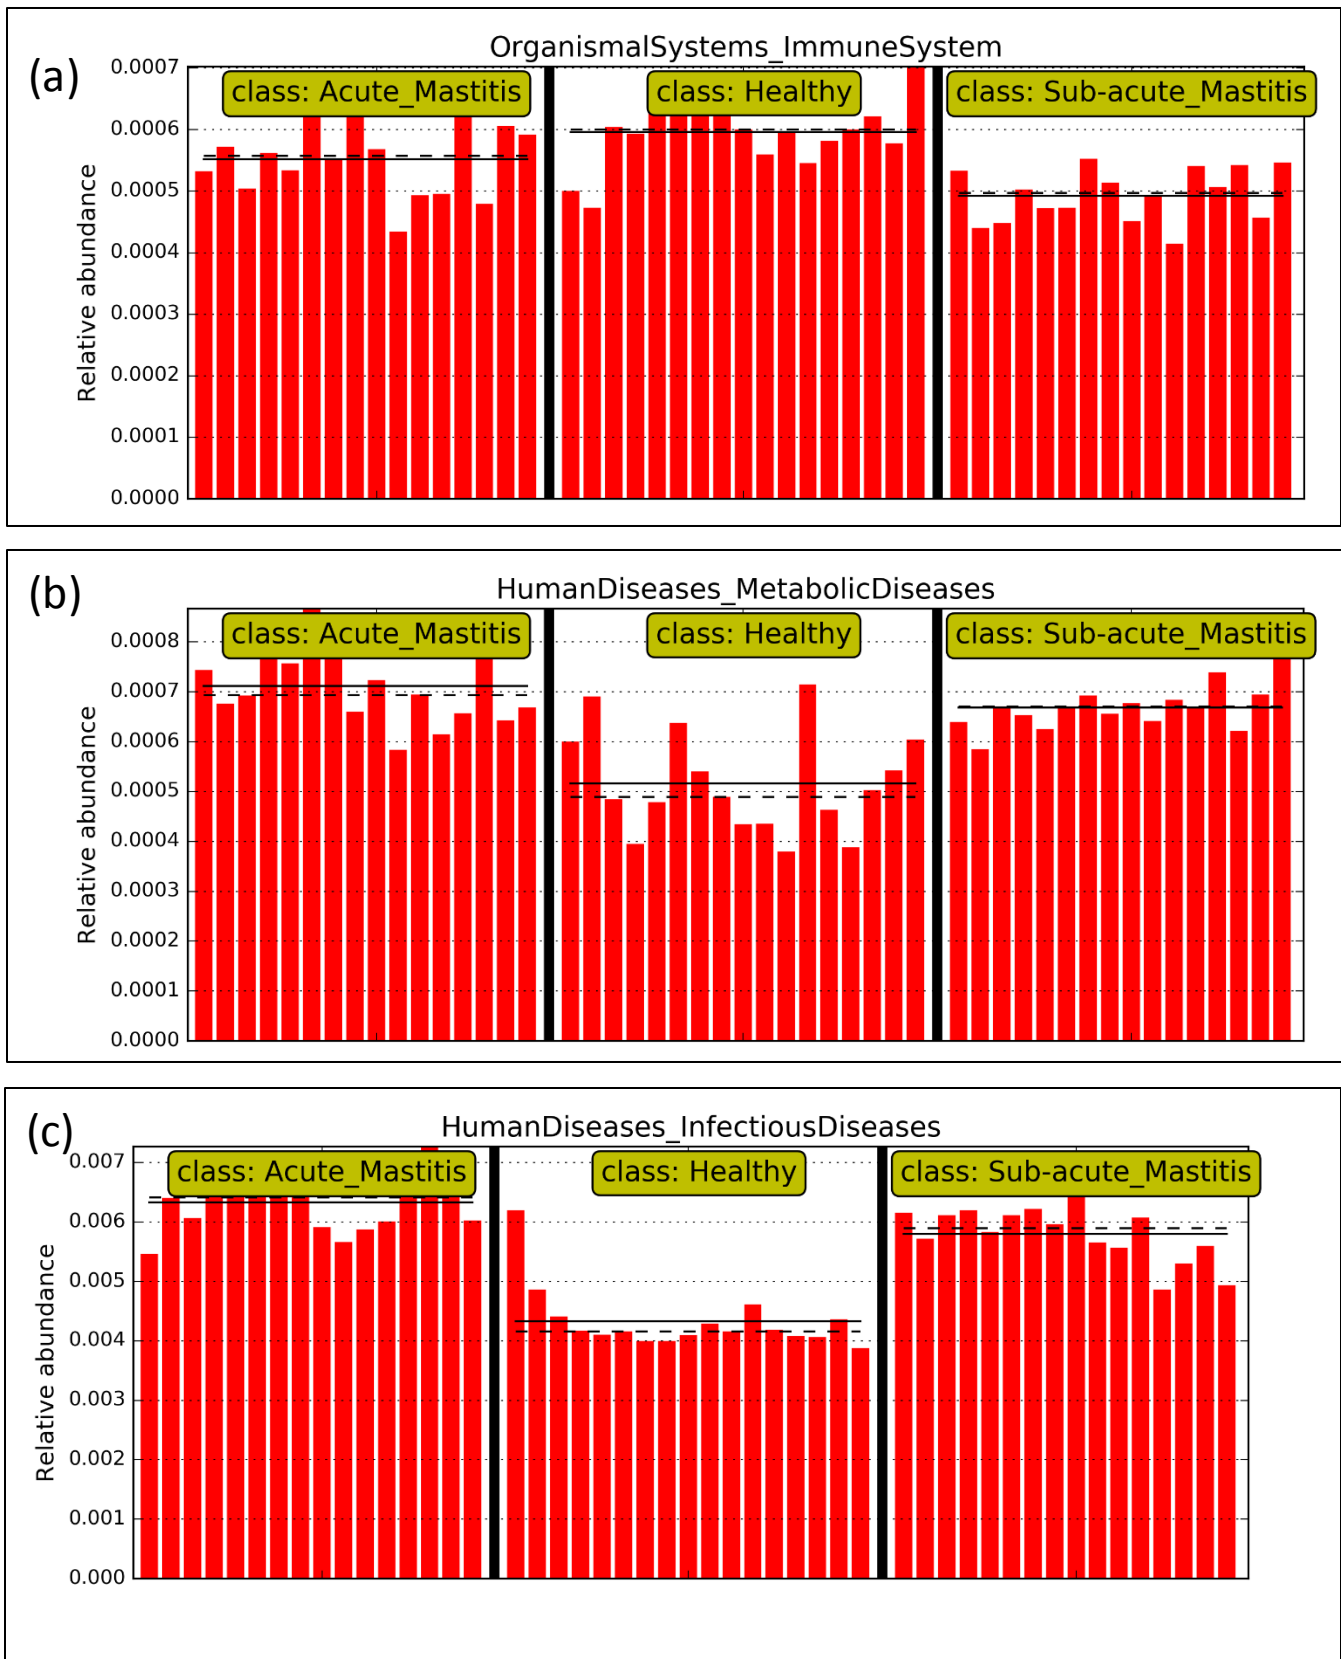

**Supplementary Table 1:**

|                                  | <b>Healthy</b>   | <b>Subacute mastitis</b> | <b>Acute mastitis</b> |
|----------------------------------|------------------|--------------------------|-----------------------|
| Study population, n              | 18               | 16                       | 16                    |
| Age, years $\pm$ SD              | 25.29 $\pm$ 1.82 | 25.93 $\pm$ 2.37         | 26.12 $\pm$ 1.31      |
| Postpartum period, days $\pm$ SD | 20.58 $\pm$ 4.04 | 24.93 $\pm$ 3.92         | 24.75 $\pm$ 2.97      |

**Supplementary Table 2:**

| <b>Sample Group</b> | <b>Raw sequences</b> | <b>Quality Filtered Sequences</b> | <b>Observed OTUs*</b> | <b>Phylogenetic diversity*</b> |
|---------------------|----------------------|-----------------------------------|-----------------------|--------------------------------|
| Healthy             | 1066028              | 839140                            | 506 (297-788)         | 20.37 (14.29-27.98)            |
| Subacute mastitis   | 962855               | 647843                            | 430 (255-603)         | 12.01 (5.24-19.61)             |
| Acute mastitis      | 1416549              | 655902                            | 427 (206-764)         | 16.38 (7.60-29.13)             |

\*Asterisk indicate calculation of alpha diversity indices after rarefaction to 4718 sequences per sample.
